# Supplementary material for: Spontaneous bacterial peritonitis in Wilson's disease.
Source: Royal Society of Chemistry journal article supplement (doi:10.1039/d3ra07422f), 1987-01-01
Supplement: d3ra07422f1.pdf [file d3ra07422f1.pdf]

## **Mebendazolium mesylate anhydride salt: rational design based on supramolecular assembly, synthesis, and solid-state characterization**

Eduardo L. Gutiérrez,<sup>\*a</sup> Agustín A. Godoy<sup>b†</sup>, Elena V. Brusau<sup>b</sup>, Daniel Vega<sup>c</sup>, Griselda E. Narda<sup>b</sup>, Sebastián Suárez<sup>d</sup> and Florencia Di Salvo<sup>d</sup>

*a. INQUISAL–CONICET, Área de Química Física, Facultad de Química, Bioquímica y Farmacia, Universidad Nacional de San Luis, Chacabuco y Pedernera, CP 5700, San Luis, Argentina.*

*b. Instituto de Investigaciones en Tecnología Química (INTEQUI), Área de Química General e Inorgánica “Dr. G. F. Puellas”, Facultad de Química, Bioquímica y Farmacia, Universidad Nacional de San Luis, Almt. Brown 1500-1402, D5700APA, Chacabuco y Pedernera, CP 5700, San Luis, Argentina.*

*c. Gerencia de Investigación y Aplicaciones, Centro Atómico Constituyentes, Comisión Nacional de Energía Atómica, Av. Gral. Paz 1499, 1650 San Martín, Buenos Aires, Argentina.*

*d. INQUIMAE-CONICET y Departamento de Química Inorgánica, Analítica y Química Física, Facultad de Ciencias Exactas y Naturales, Universidad de Buenos Aires, CABA, Argentina.*

† Present address: Departamento de Física de la Materia Condensada, Instituto de Nanociencia y Nanotecnología, Centro Atómico Constituyentes, Comisión Nacional de Energía Atómica (CNEA), Avenida General Paz 1499, (1650) San Martín, Buenos Aires, Argentina.

\* [egutierrez@unsl.edu.ar](mailto:egutierrez@unsl.edu.ar)

## Electronic Supplementary Information (ESI)

### Introduction

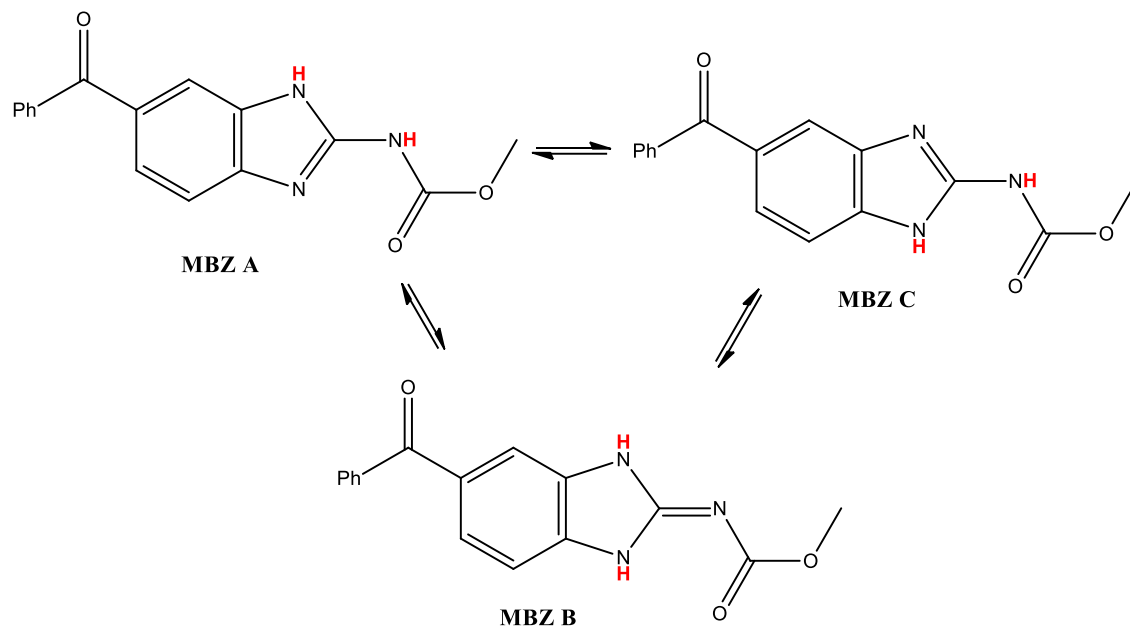

**Scheme S1.** Tautomeric equilibria between the three tautomers found in MBZ A, MBZ B, and MBZ C desmotopes respectively.

### Experimental

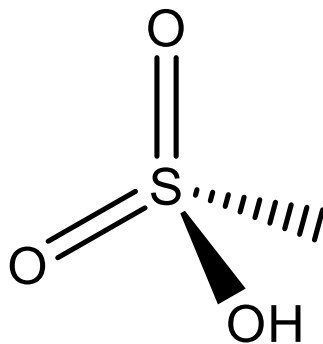

**Scheme S2.** Methanesulfonic acid molecular structure (MsOH).

## Results and discussion

**Table S1.** MBZ⋯MBZ  $R_2^2(8)$  homosynthon found in MBZ A.

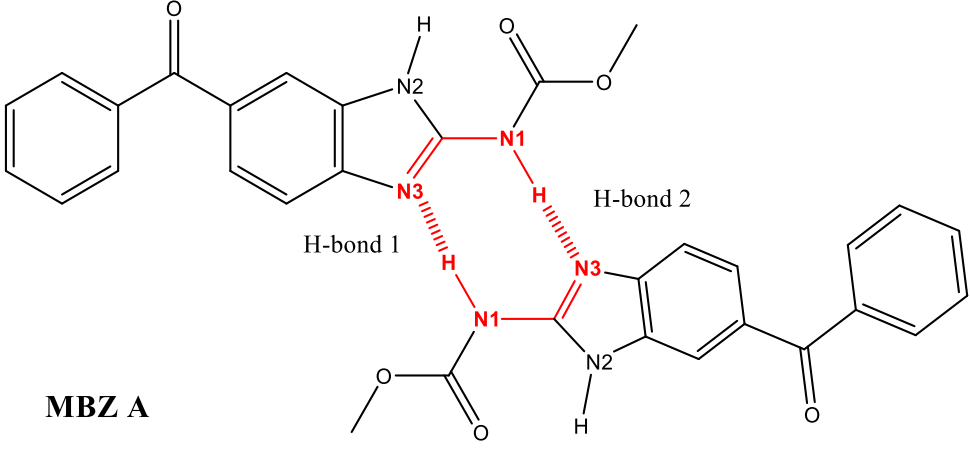

|                    | H-bond 1 |         | H-bond 2 |         |
|--------------------|----------|---------|----------|---------|
|                    | A⋯H / Å  | A⋯D / Å | A⋯H / Å  | A⋯D / Å |
| MBZ A <sup>A</sup> | 2.1      | 2.86(3) | 2.1      | 2.86(3) |

<sup>A</sup> F. F. Ferreira, S. Antonio Gutierrez, P. C. Pires Rosa and C. de O. Paiva-Santos, *Int. J. Drug Dev. Res.*, 2011, **3**, 26–33. (CCDC deposition number: 736731).

**Table S2.** MBZ⋯MBZ  $R_2^2(8)$  homosynthon found in MBZ B.

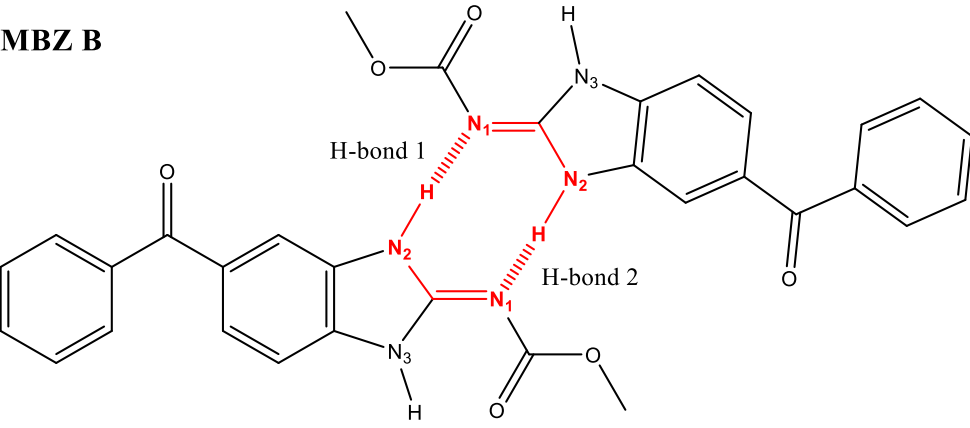

|                    | H-bond 1 |          | H-bond 2 |          |
|--------------------|----------|----------|----------|----------|
|                    | A⋯H / Å  | A⋯D / Å  | A⋯H / Å  | A⋯D / Å  |
| MBZ B <sup>B</sup> | 1.92     | 2.992(9) | 1.92     | 2.992(9) |

<sup>B</sup> F. Bravetti, S. Bordignon, E. Alig, D. Eisenbeil, L. Fink, C. Nervi, R. Gobetto, M. U. Schmidt, and M. R. Chierotti, *Chem. Eur. J.*, 2021, **98**, e202103589. (CCDC deposition number: 2095820).

**Table S3.** MBZ⋯MBZ R<sub>2</sub><sup>2</sup>(8) homosynthon found in MBZ C.
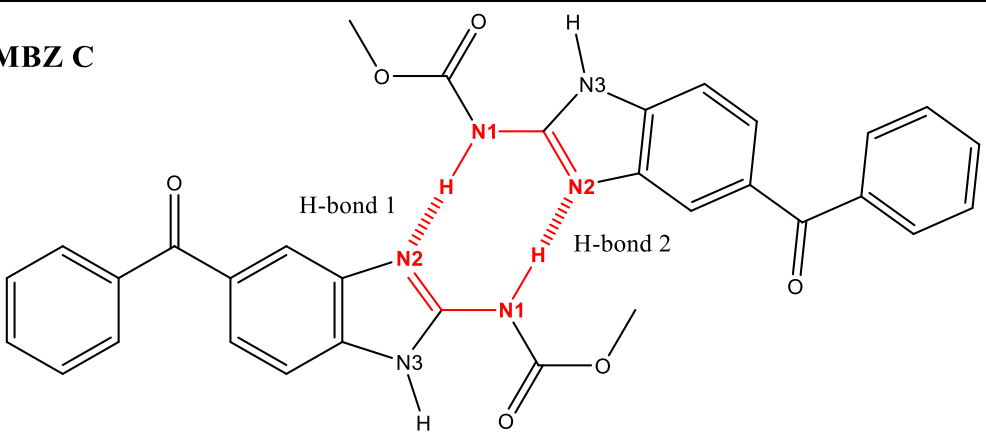

|                    | H-bond 1 |          | H-bond 2 |          |
|--------------------|----------|----------|----------|----------|
|                    | A⋯H / Å  | A⋯D / Å  | A⋯H / Å  | A⋯D / Å  |
| MBZ C <sup>c</sup> | 1.99     | 2.872(8) | 1.99     | 2.872(8) |

<sup>c</sup> F. T. Martins, P. P. Neves, J. Ellena, G. E. Camí, E. V. Brusau and G. E. Narda, *J. Pharm. Sci.*, 2009, **98**, 2336–2344. (CCDC deposition number: 690724).

**Table S4**

Conformational parameters involved in the formation of heterosynthons I and II  
(CCDC deposition number)

| Mebendazolium salts                         | C3–N1 / Å | $\alpha$ / ° | $\beta$ / ° | $\gamma$ / ° | $\delta$ / ° | $\epsilon$ / ° |
|---------------------------------------------|-----------|--------------|-------------|--------------|--------------|----------------|
| Reference parameters                        | 1.37(1)   | 120          | 120         | 120          | 0            | 120            |
|                                             |           |              |             |              |              | 109.5          |
| Nitrate <sup>1</sup> (I) (1585622)          | 1.349(3)  | 123.3(2)     | 118         | 118          | –1.4(4)      | 120.2(3)       |
| Perchlorate <sup>2</sup> (I) (1995782)      | 1.341(6)  | 123.5(4)     | 118         | 118          | 2.7(7)       | 110.0(2)       |
| Methylsulfate <sup>2</sup> (I) (1995783)    | 1.341(3)  | 123.0(2)     | 118         | 119          | 0.5(4)       | 113.6(1)       |
| Mesylate anhydride (I) (this work)          | 1.348(10) | 124.3(7)     | 118         | 118          | 1.5(13)      | 111.6(3)       |
| Methanoate <sup>3</sup> (I) (929536)        | 1.356(5)  | 123.0(4)     | 118         | 119          | 6.2(7)       | 126.5(5)       |
|                                             | 1.333(6)  | 122.9(4)     | 119         | 119          | –2.0(7)      | 125.2(5)       |
|                                             | 1.348(6)  | 123.2(4)     | 118         | 118          | –0.8(7)      | 126.3(5)       |
| Methyloxalate (I) <sup>4</sup> (866968)     | 1.357(4)  | 123.7(3)     | 122         | 114          | 3.4(5)       | 127.7(3)       |
| Trifluoroacetate (II) <sup>3</sup> (929535) | 1.347(3)  | 122.5(2)     | 119         | 119          | –0.3(4)      | 129.9(2)       |
| Maleate (II) <sup>4</sup> (866969)          | 1.360(4)  | 122.7(3)     | 123.6       | 113.5        | –5.3(6)      | 123.6(3)       |
|                                             | 1.361(4)  | 120.8(3)     | 122         | 117          | –4.8(5)      |                |

**Table S5**  
Hydrogen bonds found in mebendazolium salts with non-carboxylic oxyanions  
(CCDC deposition number)

| Mebendazolium salts                           | N1–H···O5 | N2–H···O4 | Bifurcated <i>H</i> -bonds |           | C6–H···O4<br>and/or<br>C6–H···O6 |
|-----------------------------------------------|-----------|-----------|----------------------------|-----------|----------------------------------|
|                                               |           |           | N3–H···O2                  | N3–H···O6 |                                  |
| Nitrate <sup>1</sup><br>(1585622)             | 2.08 Å    | 1.87 Å    | 2.24 Å                     | 2.00 Å    | – / –                            |
| Perchlorate <sup>2</sup><br>(1995782)         | 2.04 Å    | 1.94 Å    | 2.19 Å                     | 2.14 Å    | 2.68 Å / –                       |
| Methylsulfate <sup>2</sup><br>(1995783)       | 1.89 Å    | 1.90 Å    | 2.21 Å                     | 2.04 Å    | 2.62 Å / –                       |
| Mesylate monohydrate <sup>5</sup><br>(934635) | 1.75 Å    | -         | 2.12 Å                     | 1.96 Å    | – / 2.62 Å                       |
| Mesylate anhydride<br>(this work)             | 1.87 Å    | 1.96 Å    | 2.21 Å                     | 2.00 Å    | 2.66 Å /<br>2.69 Å               |

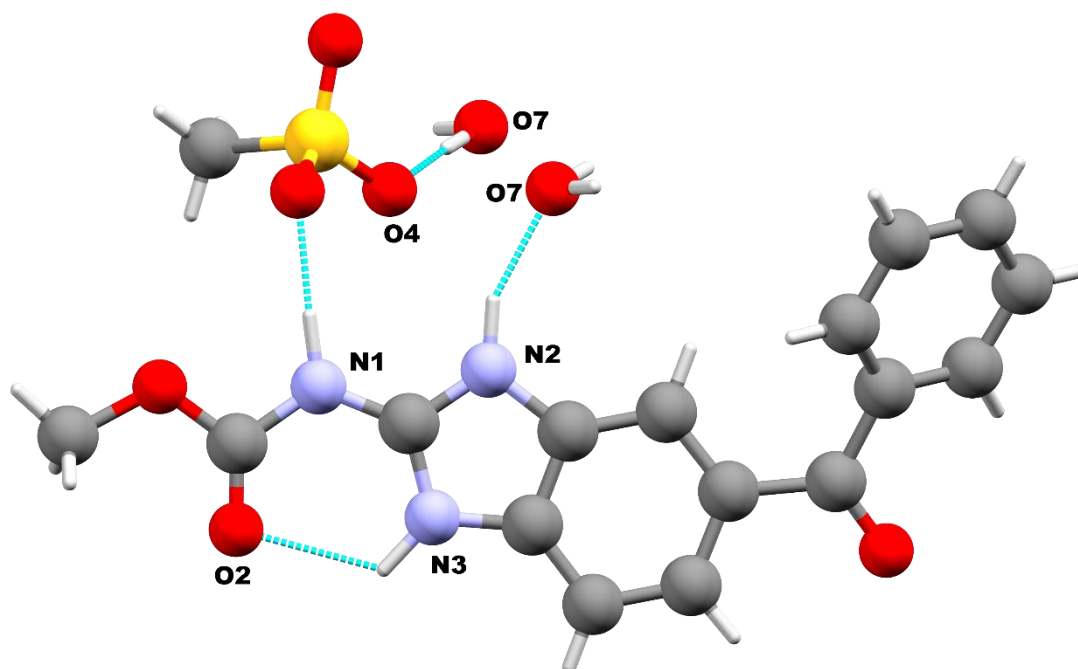

**Figure S1.** Intermolecular hydrogen bonds found in mebendazolium mesylate monohydrate salt. Color code: carbon (grey), oxygen (red), nitrogen (purple), sulfur (yellow) and hydrogen (white).

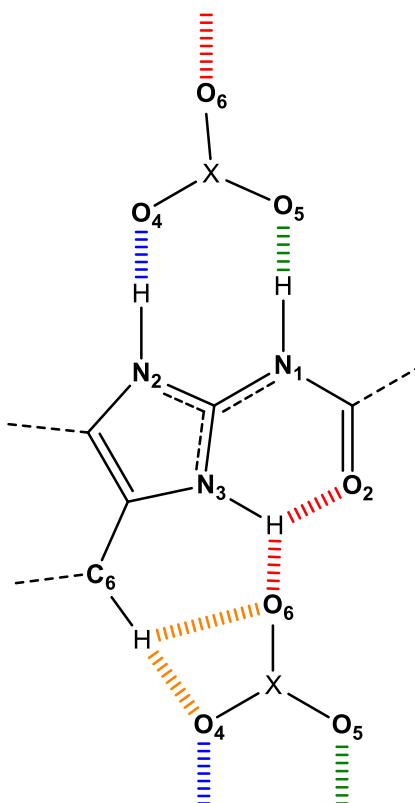

**Scheme S3.** Extended heterosynthon found in mebandazolium salts with non-carboxylic oxyanions (*i.e.*: nitrate<sup>1</sup> –CCDC 1585622–, perchlorate<sup>2</sup> –CCDC 1995782–, and methylsulfate<sup>2</sup> –1995783–) stabilized by three intermolecular hydrogen bonds.

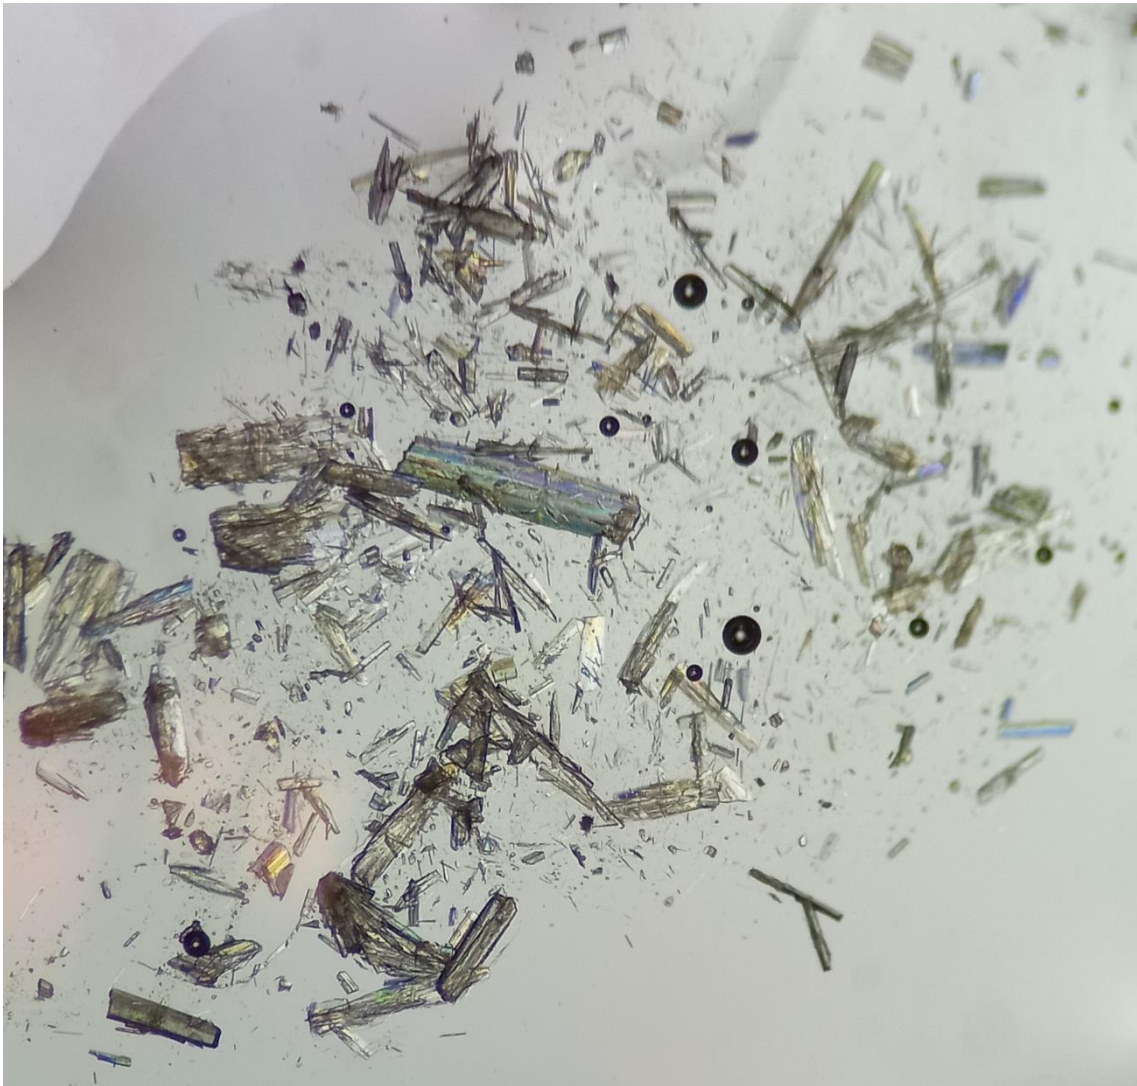

**Figure S2.** The new solid material as seen under a polarized microscope.

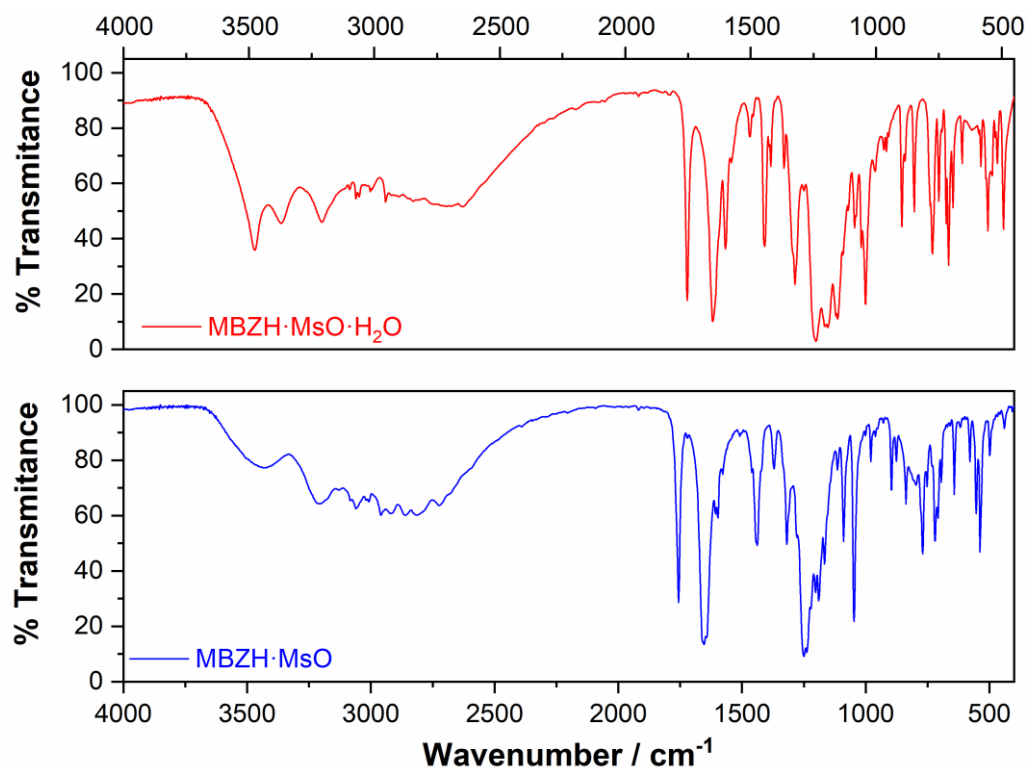

Figure S3. FT-IR spectra of the mebendazolium mesylate monohydrate salt (top) and the mebendazolium mesylate anhydrous salt (bottom).

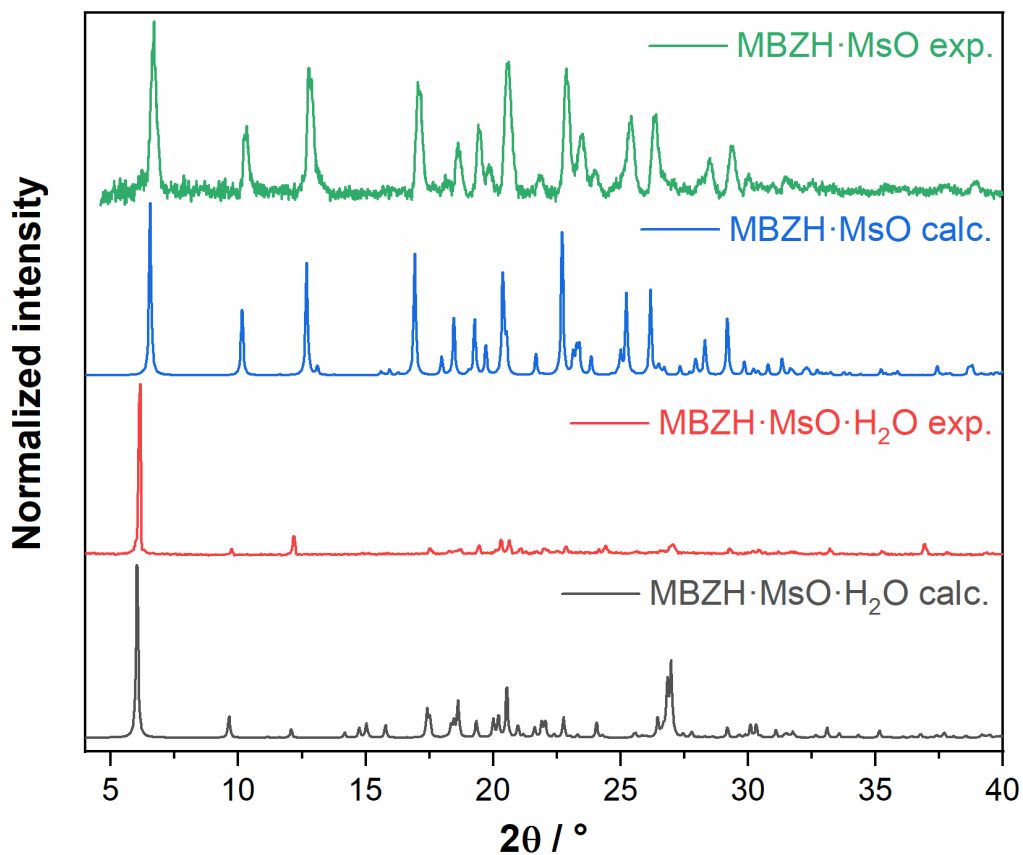

Figure S4. Experimental powder X-ray diffraction patterns of MBZH·MsO and MBZH·MsO·H<sub>2</sub>O compared with those calculated from the solved structures.



**MBZ (as in polymorph C)**

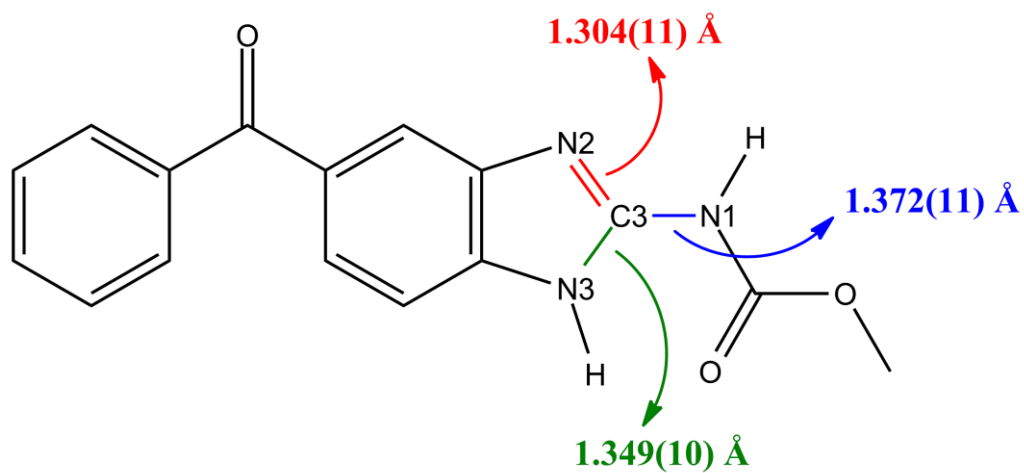

**MBZH<sup>+</sup> (as in mesylate salt)**

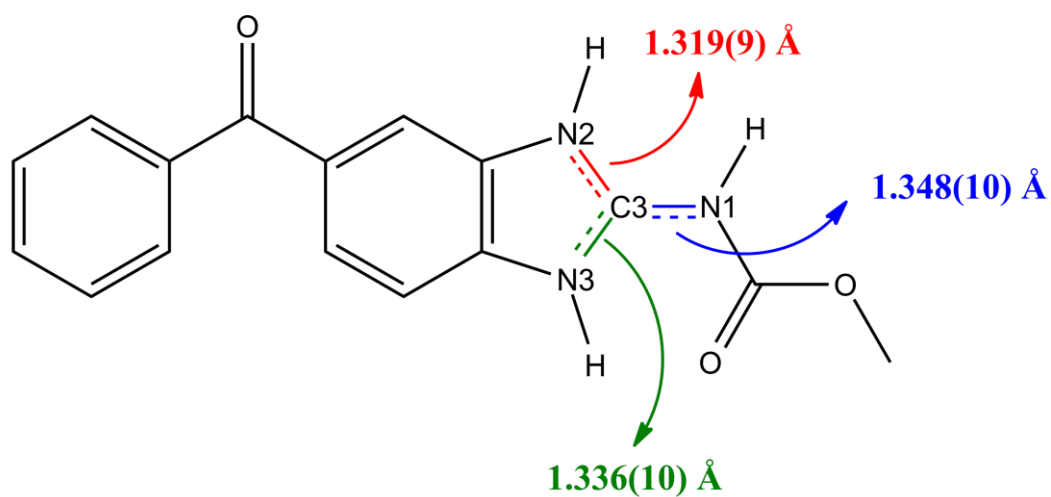

**Scheme S4.** Effect of protonation on bond lengths of MBZ molecule/ion.

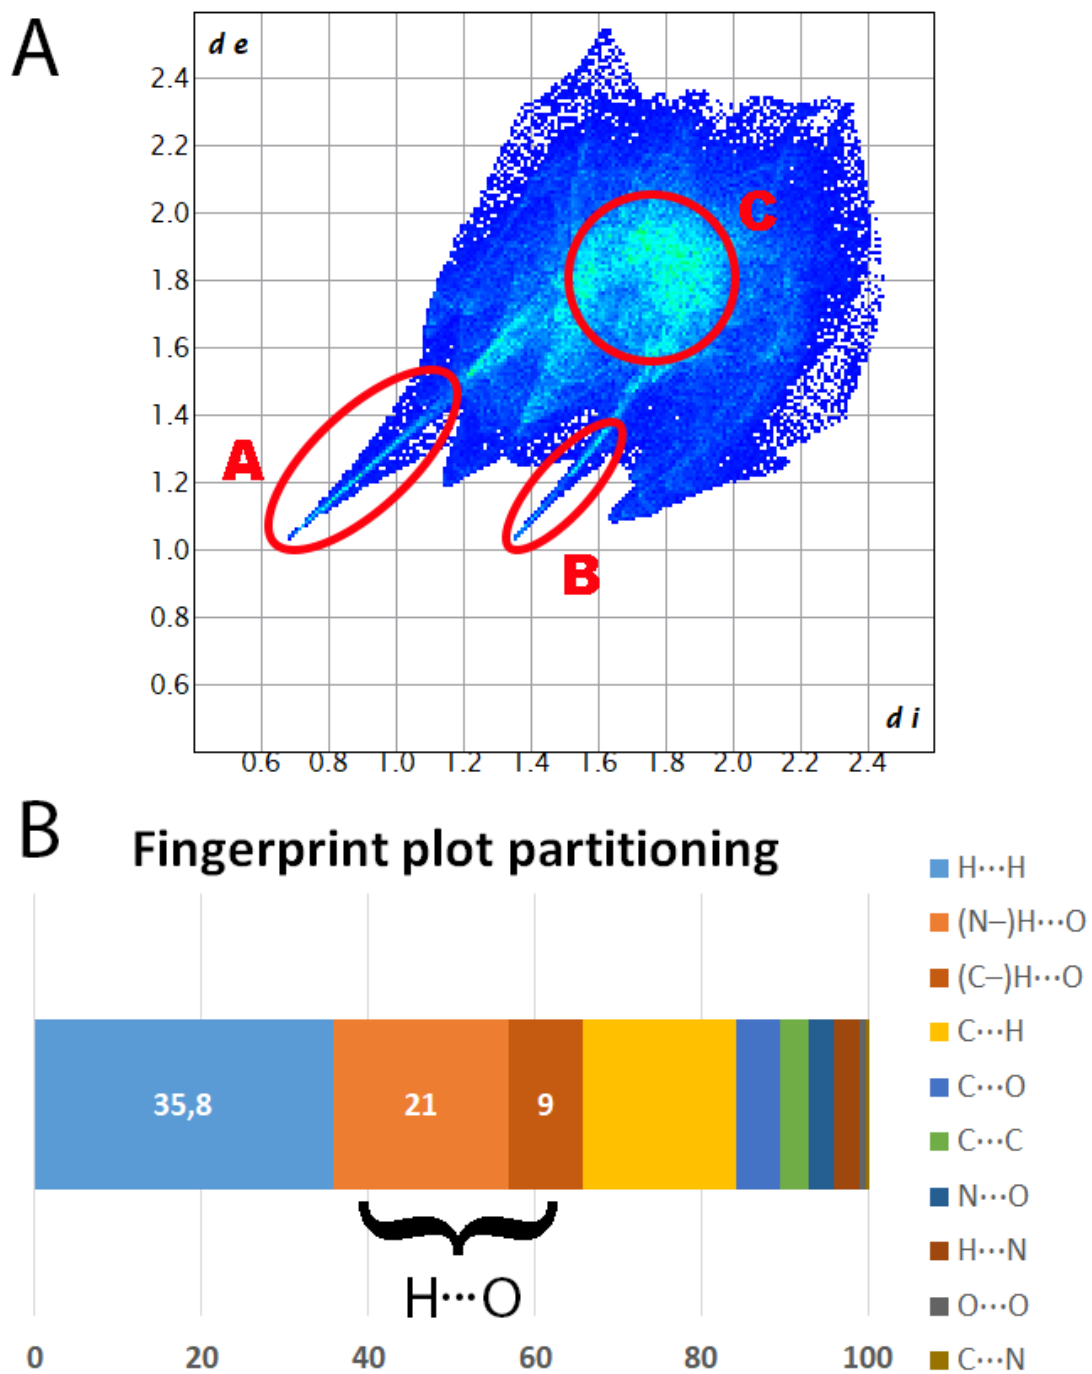

**Figure S5.** **A.** 2D-fingerprint plot of MBZH-MsO. **B.** Histogram representing the relative areas of the  $d_{norm}$  surface partitioned between the different types of close contact interactions.

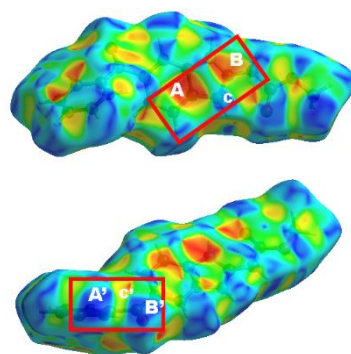

**Figure S6.** Hirshfeld surface of MBZH<sup>+</sup> cation mapped with the shape index function.

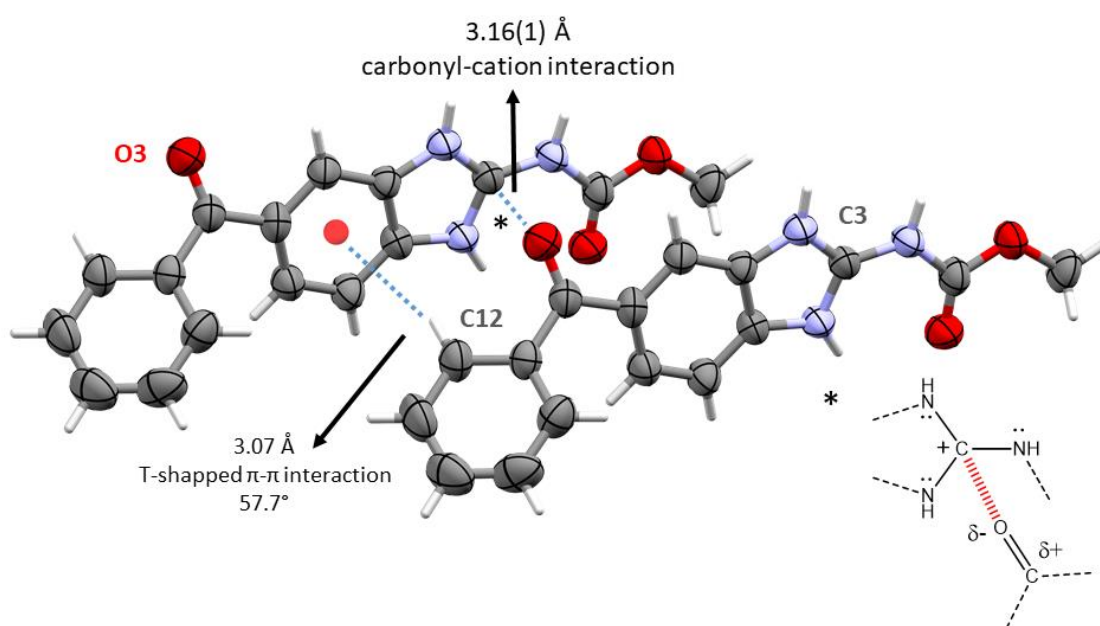

**Figure S7.** The T-shaped or edge-to-face  $\pi \cdots \pi$  and the carbonyl $\cdots\pi$  interactions found in the ac plane of the structure of MBZH·MsO.

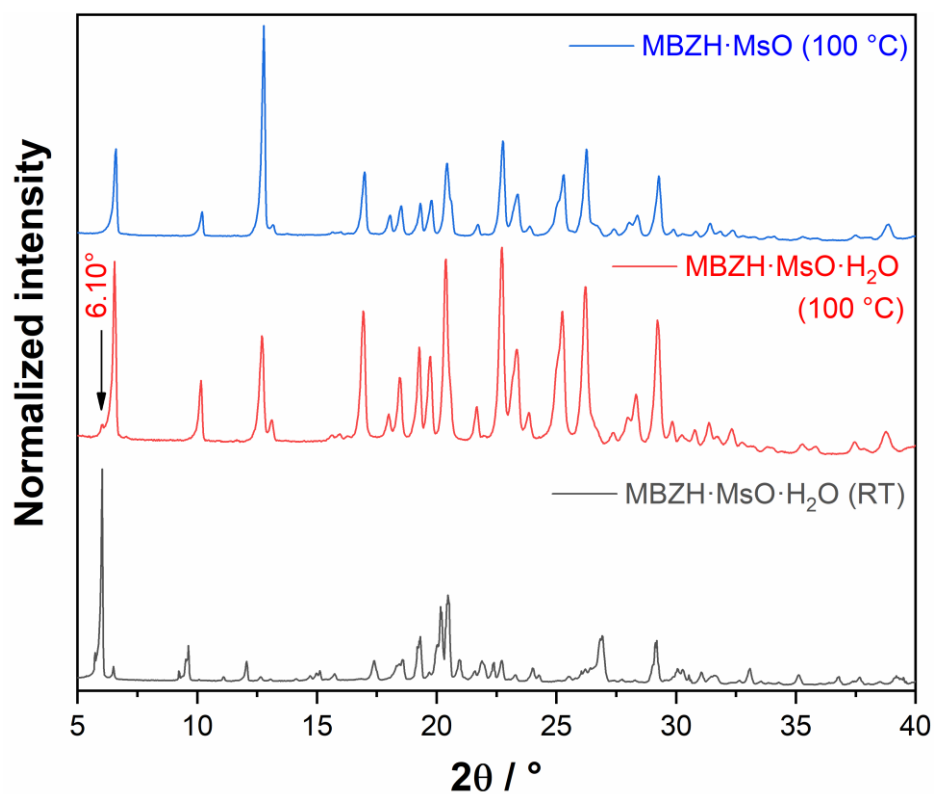

**Figure S8.** Experimental powder X-ray diffraction patterns of a sample of MBZH·MsO·H<sub>2</sub>O at room temperature (RT) (black) and after being kept at 100 °C for 60 min (red) compared to the one of MBZH·MsO in the same conditions (blue).

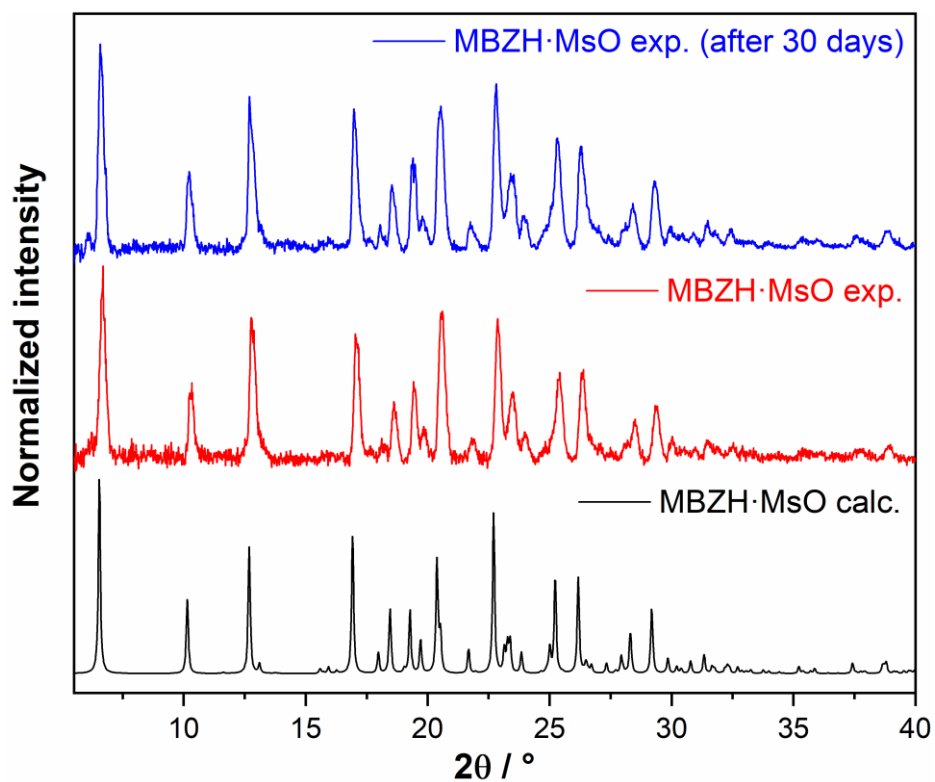

**Figure S9.** Experimental powder X-ray diffraction patterns of MBZH·MsO recently synthesized and after 30 days in contact with the atmosphere, compared to the one calculated from the solved structure of the MBZH·MsO monohydrate salt.

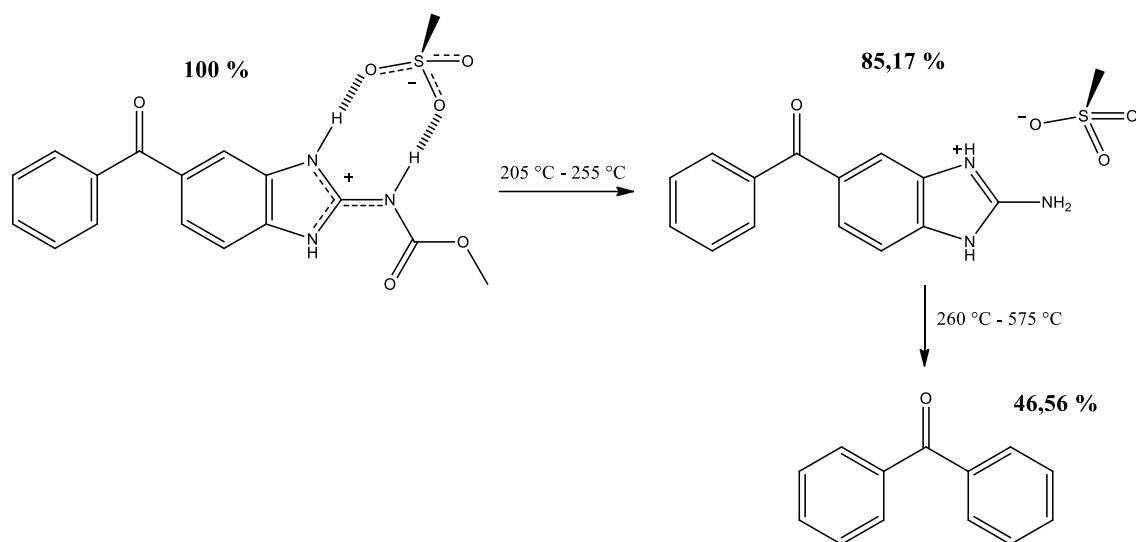

**Scheme S5.** Proposed mechanisms for MBZH·MsO thermal degradation.

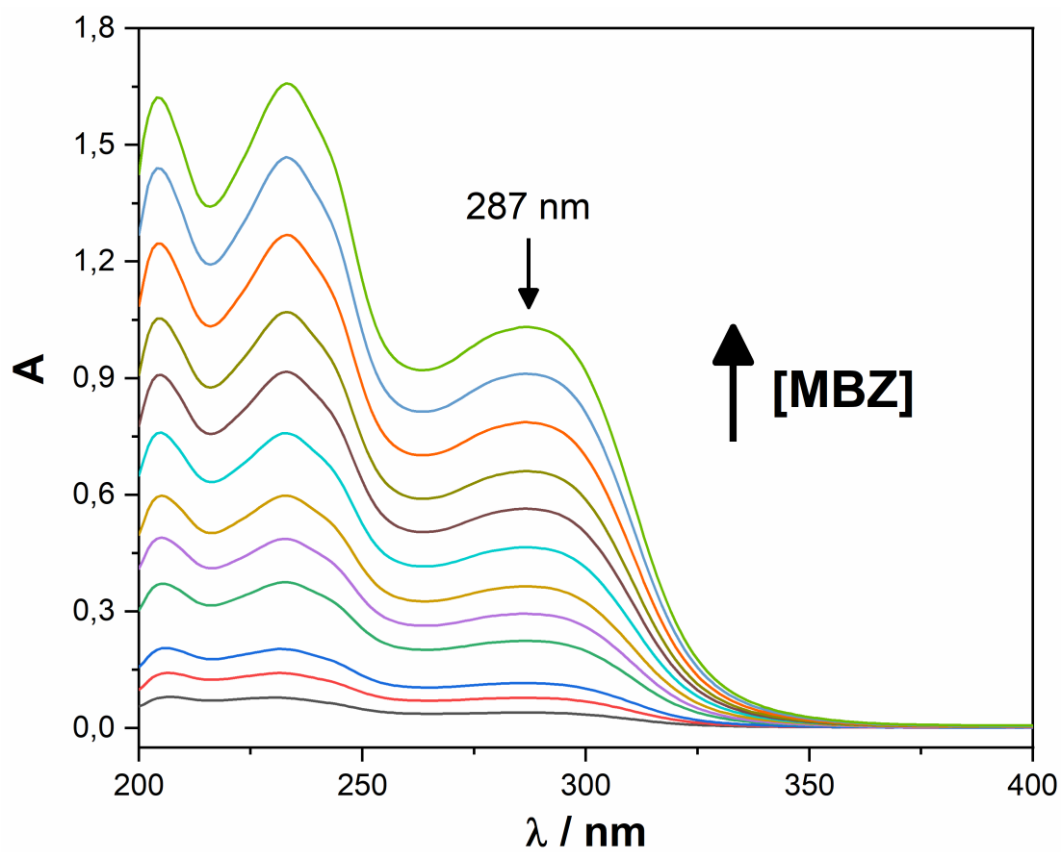

**Figure S10.** MBZ UV-vis spectra in 0.1 mol L<sup>-1</sup> hydrochloric acid aqueous solution.

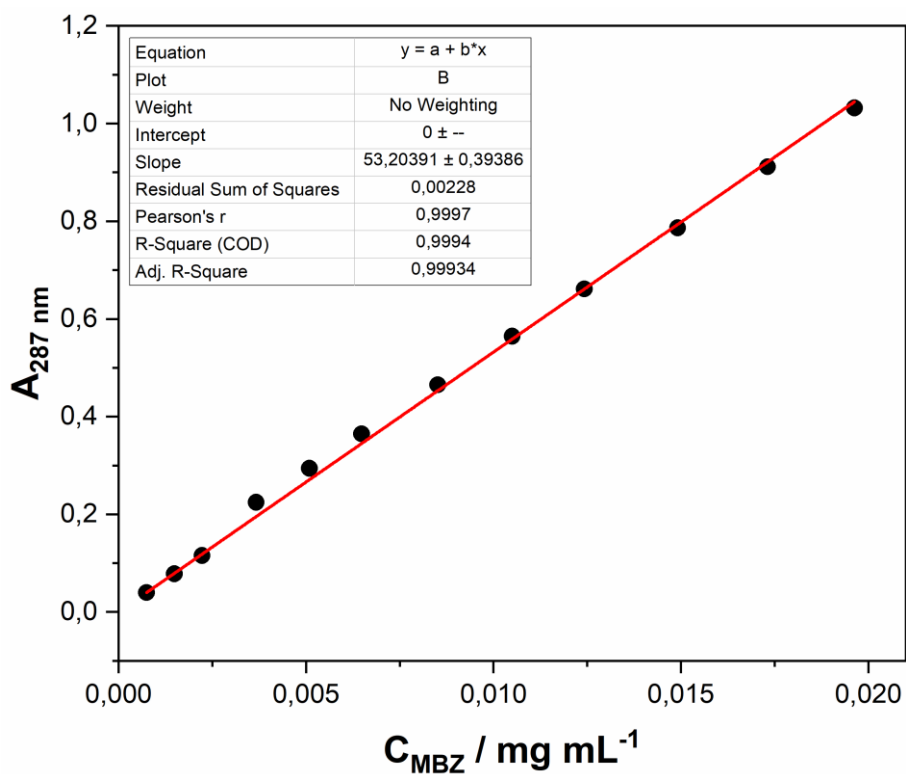

Figure S11. Calibration curve for the quantification of MBZ in 0.1 mol L<sup>-1</sup> hydrochloric acid aqueous solution.

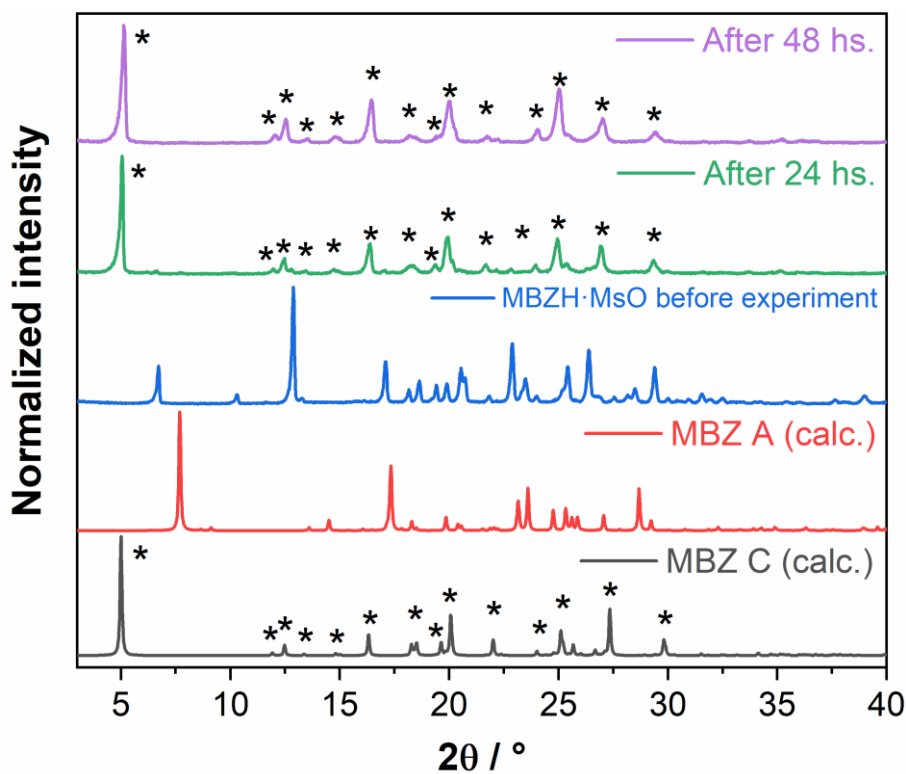

Figure S12. Power X-ray diffraction patterns of the solid sediment samples after the solubility experiment, compared with the calculated patterns of MBZ C, MBZ A and MBZH·MsO. (\*: MBZ C peaks.)

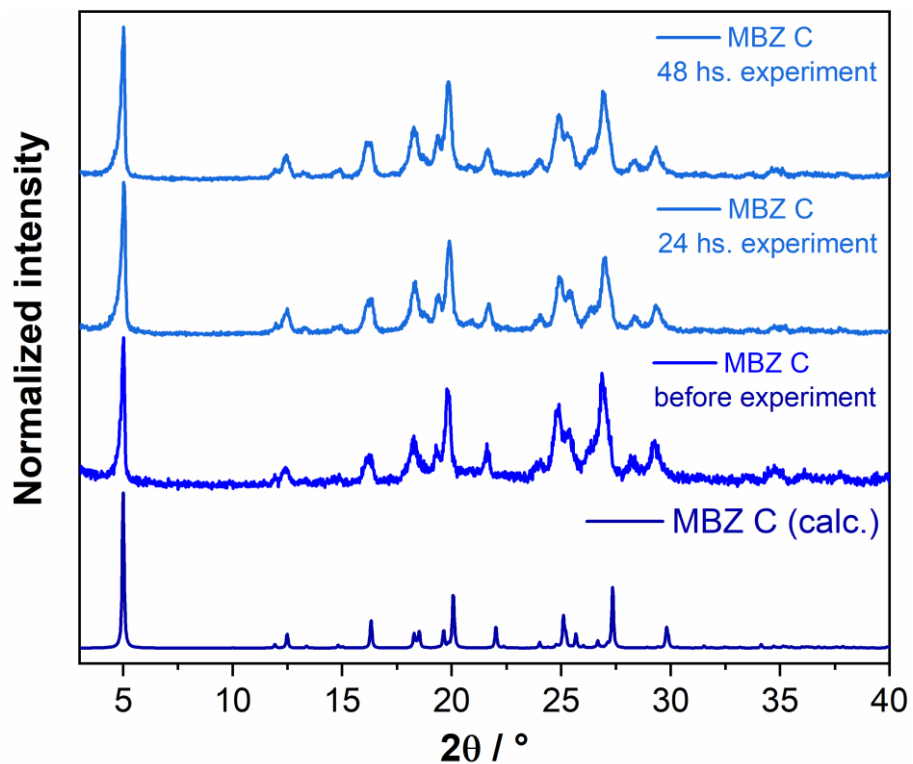

Figure S13. Power X-ray diffraction patterns of the MBZ C before and after the solubility experiment, compared to the calculated pattern.

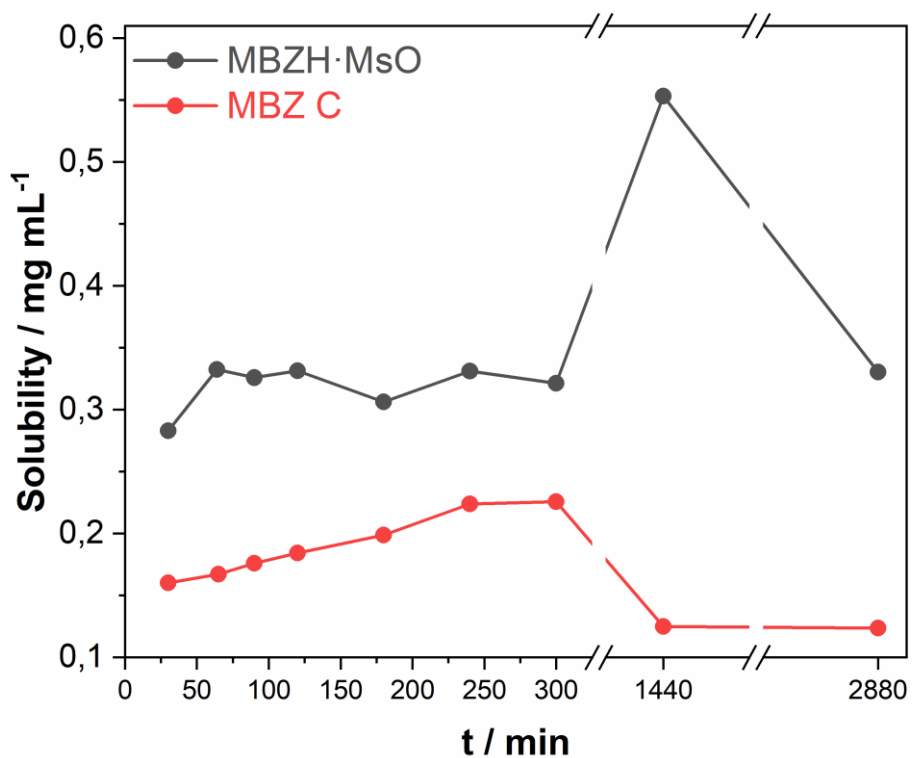

Figure S14. Solubility evolution of MBZH·MsO and MBZ C in 0.1 mol L<sup>-1</sup> hydrochloric acid aqueous solution.

## Bibliography

- 1 E. L. Gutiérrez, M. S. Souza, L. F. Diniz and J. Ellena, *J. Mol. Struct.*, 2018, **1161**, 113–121.
- 2 E. L. Gutiérrez, A. A. Godoy, G. E. Narda and J. Ellena, *CrystEngComm*, 2020, **22**, 6559–6568.
- 3 J. Chen and T. Lu, *Chinese J. Chem.*, 2013, **31**, 635–640.
- 4 J.-M. Chen, Z.-Z. Wang, C.-B. Wu, S. Li and T.-B. Lu, *CrystEngComm*, 2012, **14**, 6221.
- 5 K. de Paula, G. E. Camí, E. V. Brusau, G. E. Narda and J. Ellena, *J. Pharm. Sci.*, 2013, **102**, 3528–3538.
